# Supplementary material for: Feasibility, Method and Early Outcome of Image-Guided Volumetric Modulated Arc Radiosurgery Followed by Resection for AJCC Stage IIA–IIIB High-Risk Large Intraocular Melanoma
Source: MDPI journal article supplement (doi:10.3390/cancers14194729), 2022-09-28
Supplement: s1 [file s1]

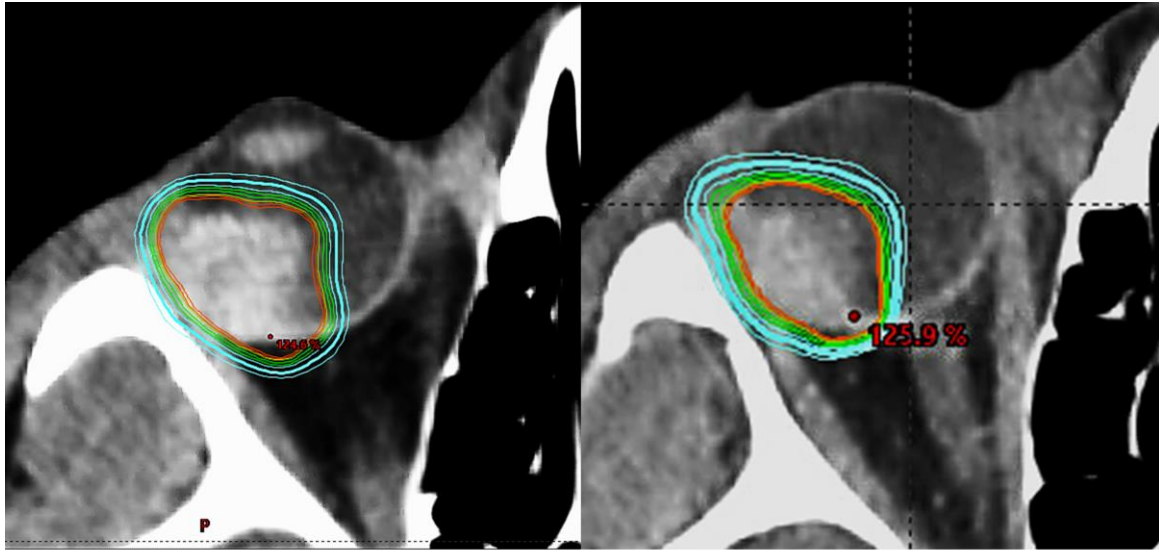

**Figure S1.** LINAC cone-beam computed tomography (CBCT), control CBCT scan onboard with intravenous contrast agent after retrobulbar anaesthesia before SRS; visualization of isodose lines.

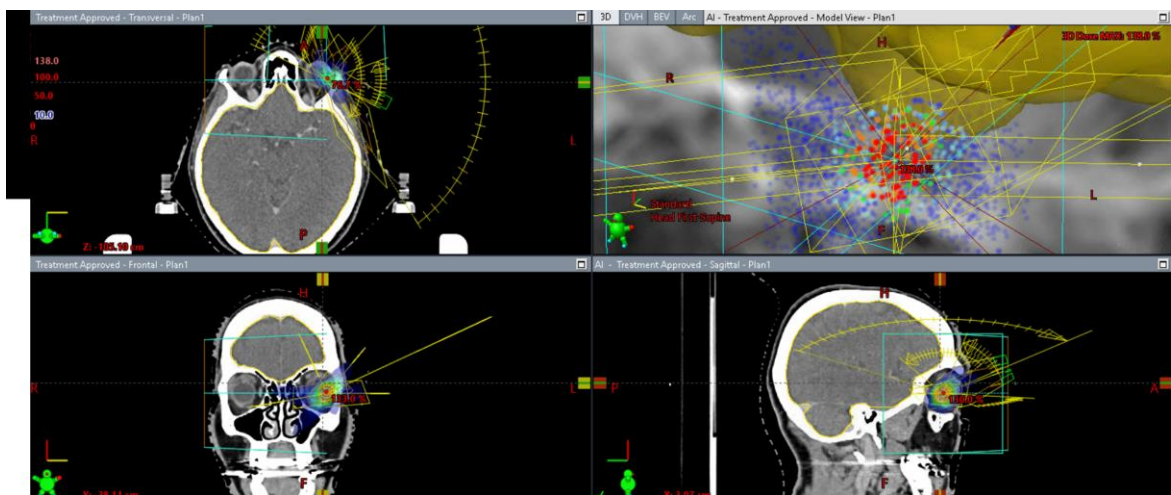

**Figure S2.** Treatment plan showing the field alignment and the low dose distribution. The brain is completely blocked to irradiation entrance or exit beams.
